# Supplementary material for: 131I-Labeled gold nanoframeworks for radiotherapy-combined second near-infrared photothermal therapy of cancer
Source: Royal Society of Chemistry journal article supplement (doi:10.1039/d1tb02115j), 2021-01-01
Supplement: d1tb02115j1.pdf [file d1tb02115j1.pdf]

## Supplementary information

### **<sup>131</sup>I-labeled gold nanoframeworks for radiotherapy-combined second near-infrared photothermal therapy of cancer**

Danling Cheng,<sup>‡a</sup> Jiali Gong,<sup>‡b</sup> Peng Wang,<sup>‡c</sup> Jingyi Zhu,<sup>a,d</sup> Ningyue Yu,<sup>a</sup> Jinhua Zhao,<sup>\*b</sup> Qin Zhang<sup>\*e</sup> and Jingchao Li<sup>\*a</sup>

<sup>a</sup> Shanghai Key Laboratory of Lightweight Composite, College of Chemistry, Chemical Engineering and Biotechnology,

Donghua University, Shanghai 201620, P. R. China. Email: jcli@dhu.edu.cn

<sup>b</sup> Department of Nuclear Medicine, Shanghai General Hospital, Shanghai Jiao Tong University School of Medicine,

Shanghai 200080, P. R. China. Email: zhaojinhua1963@126.com

<sup>c</sup> Department of General Surgery, The Fifth People's Hospital of Jinan, 250022, P. R. China

<sup>d</sup> School of Pharmaceutical Sciences, Nanjing Tech University, Nanjing 211816, People's Republic of China

<sup>e</sup> Institute of Translational Medicine, Shanghai University, Shanghai 200444, P. R. China. Email:

sabrina\_1985@shu.edu.cn

<sup>‡</sup> Danling Cheng, Jiali Gong and Peng Wang contributed equally to this work.

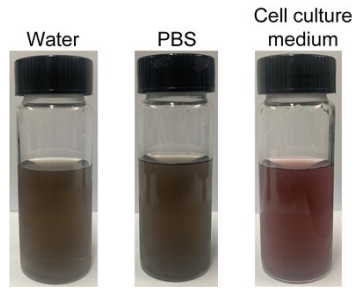

**Fig. S1.** Photographs of AuNFs after storage in water, PBS and cell culture medium for 7 days.

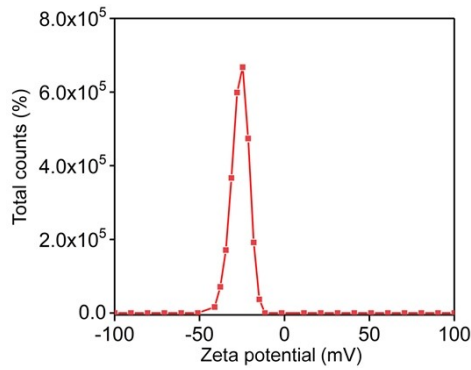

**Fig. S2.** Zeta potential of AuNFs dispersed in aqueous solution.

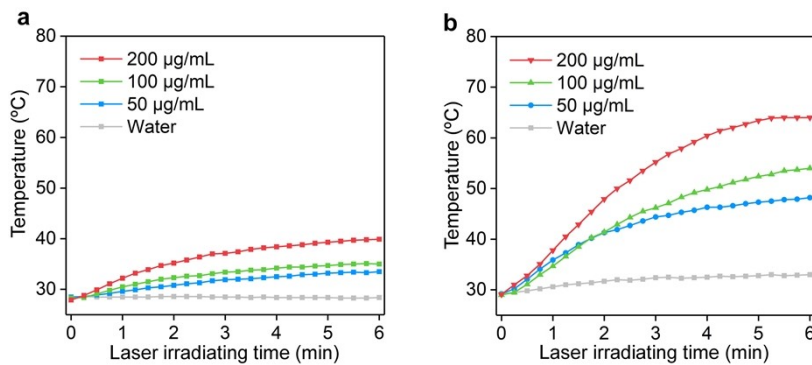

**Fig. S3.** Temperature curves of water and aqueous solution of AuNFs at Au concentration of 50, 100, and 200 µg/mL under 1064 nm laser irradiation at the power density of 0.3 W/cm<sup>2</sup> (a) and 1.3 W/cm<sup>2</sup> (b) for different time..

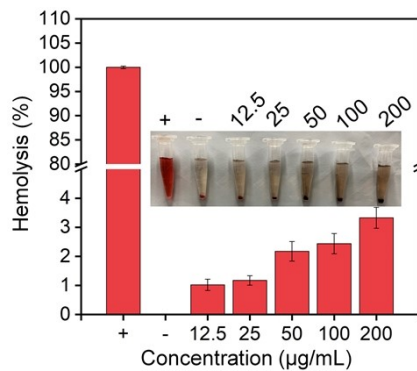

**Fig. S4.** Hemolysis assay of mouse blood red cells after incubation with water (positive control), PBS (negative control), and AuNFs at different Au concentrations for 2 h. Insert is the photograph of mouse blood red cells after incubation with water, PBS, and AuNFs at different Au concentrations for 2 h, followed by centrifugation.

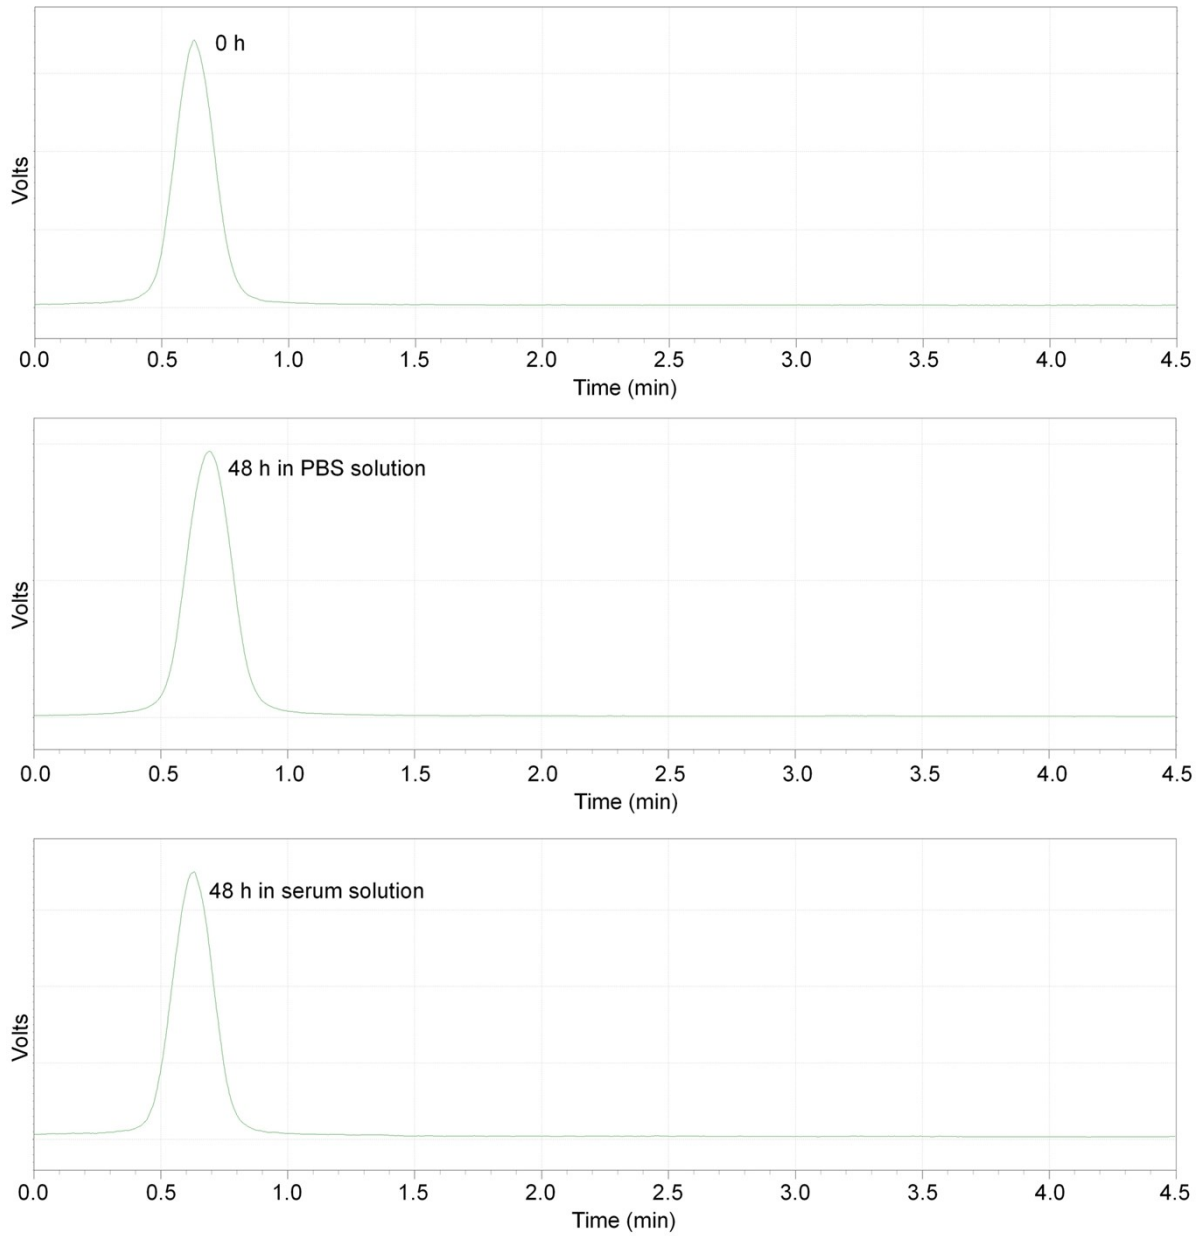

**Fig. S5.** The radiolabeling stability assay of  $^{131}\text{I}$ -AuNFs after storage in PBS and serum solution at 37 °C for 48 h.

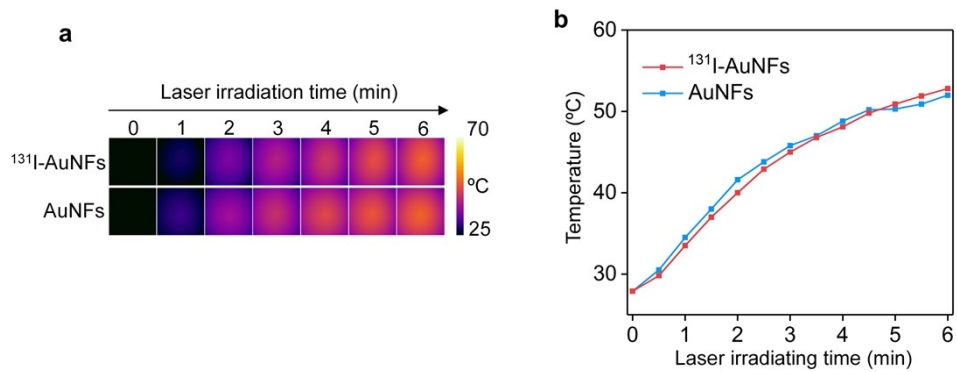

**Fig. S6.** (a) Thermal images of aqueous solution containing  $^{131}\text{I}$ -AuNFs or AuNFs at Au concentration of 100  $\mu\text{g}/\text{mL}$  under 1064 nm laser irradiation (1.0  $\text{W}/\text{cm}^2$ ) for different time. (b) Temperature curves of aqueous solution of  $^{131}\text{I}$ -AuNFs or AuNFs at Au concentration of 100  $\mu\text{g}/\text{mL}$  under 1064 nm laser irradiation (1.0  $\text{W}/\text{cm}^2$ ) for different time.

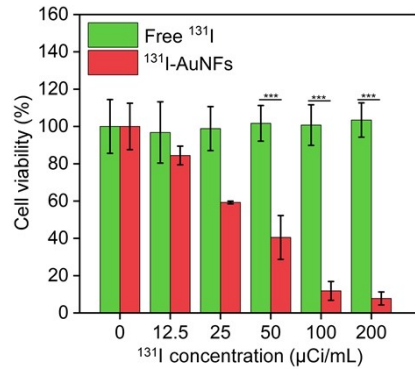

**Fig. S7.** Cell viability of 4T1 cancer cells after incubation with free <sup>131</sup>I or <sup>131</sup>I-AuNFs at different concentrations for 24 h.

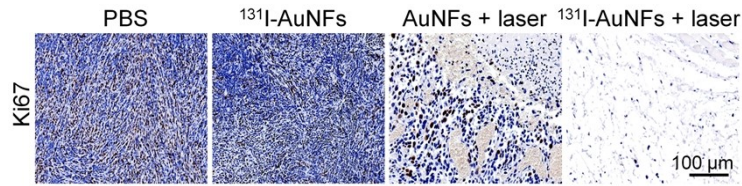

**Fig. S8.** Ki67 staining images of tumors from 4T1 tumor-bearing nude mice after intravenous injection of AuNFs and <sup>131</sup>I-AuNFs under 1064 nm laser irradiation (1.0 W/cm<sup>2</sup>).

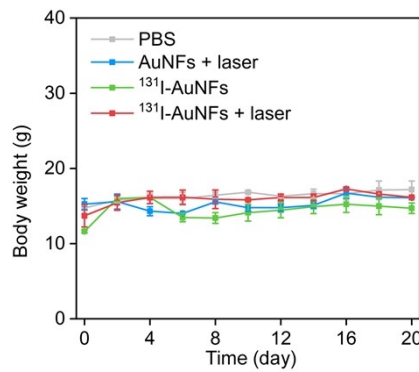

**Fig. S9.** Body weight of 4T1 tumor-bearing nude mice after different treatments.

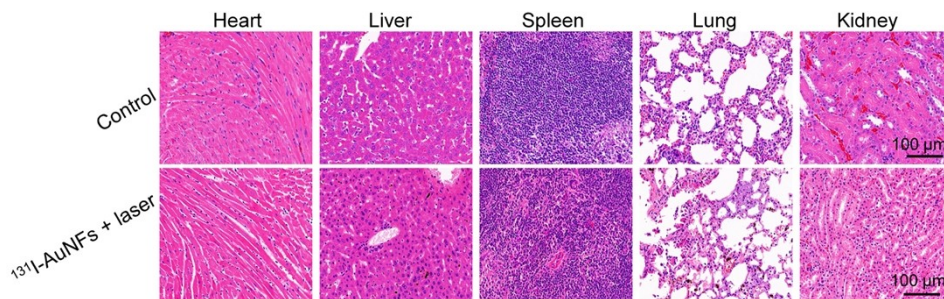

**Fig. S10.** H&E staining images of heart, liver, spleen, lung and kidney from 4T1 tumor-bearing nude mice without treatment or after <sup>131</sup>I-AuNFs-mediated therapy for 20 days.
